# Supplementary material
Source: MDPI journal article supplement (https://www.mdpi.com/2073-4441/14/5/788)
Supplement: s1 [file s1]

**Table S1.** Changes in the biomass each fish batch over time according to the input date, biomass harvested at the end of each production cycle (in red), and cumulative stocked biomass. Biomass in tons. Fish input dates are at the beginning of the months in red.

| S1           |         |         |         |         |         |         |         |         |         |          |          |          |          |          |          |          |              | S2           |         |         |              |
|--------------|---------|---------|---------|---------|---------|---------|---------|---------|---------|----------|----------|----------|----------|----------|----------|----------|--------------|--------------|---------|---------|--------------|
| Year/month   | Batch 1 | Batch 2 | Batch 3 | Batch 4 | Batch 5 | Batch 6 | Batch 7 | Batch 8 | Batch 9 | Batch 10 | Batch 11 | Batch 12 | Batch 13 | Batch 14 | Batch 15 | Batch 16 | Cum. Biomass | Year/month   | Batch 1 | Batch 2 | Cum. Biomass |
|              | 15      |         |         |         |         |         |         |         |         |          |          |          |          |          |          |          | 15           |              | 60      |         | 60           |
| 01 April     | 19      |         |         |         |         |         |         |         |         |          |          |          |          |          |          |          | 19           | 01 April     | 76      |         | 76           |
| 01 May       | 27      | 15      |         |         |         |         |         |         |         |          |          |          |          |          |          |          | 42           | 01 May       | 106     |         | 106          |
| 01 June      | 42      | 26      |         |         |         |         |         |         |         |          |          |          |          |          |          |          | 68           | 01 June      | 168     |         | 168          |
| 01 July      | 68      | 45      | 15      |         |         |         |         |         |         |          |          |          |          |          |          |          | 128          | 01 July      | 272     |         | 272          |
| 01 August    | 105     | 75      | 30      | 15      |         |         |         |         |         |          |          |          |          |          |          |          | 225          | 01 August    | 421     |         | 421          |
| 01 September | 144     | 110     | 51      | 28      |         |         |         |         |         |          |          |          |          |          |          |          | 333          | 01 September | 575     |         | 575          |
| 01 October   | 177     | 143     | 72      | 43      |         |         |         |         |         |          |          |          |          |          |          |          | 436          | 01 October   | 710     |         | 710          |
| 01 November  | 198     | 162     | 87      | 54      |         |         |         |         |         |          |          |          |          |          |          |          | 501          | 01 November  | 792     |         | 792          |
| 01 December  | 209     | 172     | 95      | 61      |         |         |         |         |         |          |          |          |          |          |          |          | 538          | 01 December  | 835     |         | 835          |
| 02 January   | 218     | 181     | 103     | 67      |         |         |         |         |         |          |          |          |          |          |          |          | 570          | 02 January   | 874     |         | 874          |
| 02 February  | 224     | 186     | 107     | 71      |         |         |         |         |         |          |          |          |          |          |          |          | 587          | 02 February  | 894     |         | 894          |
| 02 March     | 234     | 196     | 115     | 78      | 15      |         |         |         |         |          |          |          |          |          |          |          | 638          | 02 March     | 936     |         | 936          |
| 02 April     | 250     | 212     | 128     | 90      | 19      |         |         |         |         |          |          |          |          |          |          |          | 699          | 02 April     | 1002    |         | 1002         |
| 02 May       | 278     | 237     | 150     | 110     | 27      | 15      |         |         |         |          |          |          |          |          |          |          | 818          | 02 May       | 1111    |         | 1111         |
| 02 June      | 322     | 279     | 186     | 142     | 42      | 26      |         |         |         |          |          |          |          |          |          |          | 998          | 02 June      | 1287    |         | 1287         |
| 02 July      | 378     | 333     | 234     | 186     | 68      | 45      | 15      |         |         |          |          |          |          |          |          |          | 1261         | 02 July      | 1514    |         | 1514         |
| 02 August    |         | 395     | 289     | 238     | 105     | 75      | 30      | 15      |         |          |          |          |          |          |          |          | 1148         | 02 August    |         |         | 0            |
| 02 September |         |         | 342     | 287     | 144     | 110     | 51      | 28      |         |          |          |          |          |          |          |          | 963          | 02 September |         |         | 0            |
| 02 October   |         |         | 386     | 329     | 177     | 143     | 72      | 43      |         |          |          |          |          |          |          |          | 1151         | 02 October   |         |         | 0            |
| 02 November  |         |         |         | 354     | 198     | 162     | 87      | 54      |         |          |          |          |          |          |          |          | 855          | 02 November  |         |         | 0            |
| 02 December  |         |         |         | 381     | 209     | 172     | 95      | 61      |         |          |          |          |          |          |          |          | 918          | 02 December  |         |         | 0            |

(Table S1 continuation)

|             |  |  |  |  |     |     |     |     |    |    |  |  |  |  |  |  |     |             |  |     |     |
|-------------|--|--|--|--|-----|-----|-----|-----|----|----|--|--|--|--|--|--|-----|-------------|--|-----|-----|
| 03 January  |  |  |  |  | 218 | 181 | 103 | 67  |    |    |  |  |  |  |  |  | 570 | 03 January  |  |     | 0   |
| 03 February |  |  |  |  | 224 | 186 | 107 | 71  |    |    |  |  |  |  |  |  | 587 | 03 February |  |     | 0   |
| 03 March    |  |  |  |  | 234 | 196 | 115 | 78  | 15 |    |  |  |  |  |  |  | 638 | 03 March    |  | 60  | 60  |
| 03 April    |  |  |  |  | 250 | 212 | 128 | 90  | 19 |    |  |  |  |  |  |  | 699 | 03 April    |  | 76  | 76  |
| 03 May      |  |  |  |  | 278 | 237 | 150 | 110 | 27 | 15 |  |  |  |  |  |  | 818 | 03 May      |  | 106 | 106 |

|              |     |     |     |     |     |     |     |     |     |     |    |      |              |              |      |   |
|--------------|-----|-----|-----|-----|-----|-----|-----|-----|-----|-----|----|------|--------------|--------------|------|---|
| 03 June      | 322 | 279 | 186 | 142 | 42  | 26  |     |     |     |     |    | 998  | 03 June      | 168          | 168  |   |
| 03 July      | 378 | 333 | 234 | 186 | 68  | 45  | 15  |     |     |     |    | 1261 | 03 July      | 272          | 272  |   |
| 03 August    |     | 395 | 289 | 238 | 105 | 75  | 30  | 15  |     |     |    | 1148 | 03 August    | 421          | 421  |   |
| 03 September |     |     | 342 | 287 | 144 | 110 | 51  | 28  |     |     |    | 963  | 03 September | 575          | 575  |   |
| 03 October   |     |     | 386 | 329 | 177 | 143 | 72  | 43  |     |     |    | 1151 | 03 October   | 710          | 710  |   |
| 03 November  |     |     |     | 354 | 198 | 162 | 87  | 54  |     |     |    | 855  | 03 November  | 792          | 792  |   |
| 03 December  |     |     |     | 381 | 209 | 172 | 95  | 61  |     |     |    | 918  | 03 December  | 835          | 835  |   |
| 04 January   |     |     |     |     | 218 | 181 | 103 | 67  |     |     |    | 570  | 04 January   | 874          | 874  |   |
| 04 February  |     |     |     |     | 224 | 186 | 107 | 71  |     |     |    | 587  | 04 February  | 894          | 894  |   |
| 04 March     |     |     |     |     | 234 | 196 | 115 | 78  | 15  |     |    | 638  | 04 March     | 936          | 936  |   |
| 04 April     |     |     |     |     | 250 | 212 | 128 | 90  | 19  |     |    | 699  | 04 April     | 1002         | 1002 |   |
| 04 May       |     |     |     |     | 278 | 237 | 150 | 110 | 27  | 15  |    | 818  | 04 May       | 1111         | 1111 |   |
| 04 June      |     |     |     |     | 322 | 279 | 186 | 142 | 42  | 26  |    | 998  | 04 June      | 1287         | 1287 |   |
| 04 July      |     |     |     |     | 378 | 333 | 234 | 186 | 68  | 45  | 15 | 1261 | 04 July      | 1514         | 1514 |   |
| 04 August    |     |     |     |     |     | 395 | 289 | 238 | 105 | 75  | 30 | 15   | 1148         | 04 August    |      | 0 |
| 04 September |     |     |     |     |     |     | 342 | 287 | 144 | 110 | 51 | 28   | 963          | 04 September |      | 0 |
| 04 October   |     |     |     |     |     |     | 386 | 329 | 177 | 143 | 72 | 43   | 1151         | 04 October   |      | 0 |
| 04 November  |     |     |     |     |     |     |     | 354 | 198 | 162 | 87 | 54   | 855          | 04 November  |      | 0 |
| 04 December  |     |     |     |     |     |     |     | 381 | 209 | 172 | 95 | 61   | 918          | Dec 04       |      | 0 |
